# Supplementary material
Source: publisher figshare collection journal article supplement (https://sage.figshare.com/ndownloader/files/22773644)
Supplement: Supplementary file 1 [file 22773644]

### Summary of Included Studies

| Author                    | Title                                                                                                  | Main Aim(s)                                                                                                       | Design and Methodology                                                       | Setting and Sampling                                                                                                                                                                                    | Data analysis                                                                                                                                                                                                                                                                                                                             | Main Themes                                                                                                                                                                                                                                                                                              | Main Limitations                                                                                            |
|---------------------------|--------------------------------------------------------------------------------------------------------|-------------------------------------------------------------------------------------------------------------------|------------------------------------------------------------------------------|---------------------------------------------------------------------------------------------------------------------------------------------------------------------------------------------------------|-------------------------------------------------------------------------------------------------------------------------------------------------------------------------------------------------------------------------------------------------------------------------------------------------------------------------------------------|----------------------------------------------------------------------------------------------------------------------------------------------------------------------------------------------------------------------------------------------------------------------------------------------------------|-------------------------------------------------------------------------------------------------------------|
| Davenport <sup>28</sup>   | 'The experience of new nurses beginning critical care practice: an interpretive phenomenologic study.' | What is the experience of being a new nurse beginning clinical practice in ICU?                                   | Phenomenology<br><br>Semi-structured interviews<br>Follow up group interview | United States<br><br>5 district and tertiary referral centres<br><br>NQN purposive sample (n=8) (<1 year post qualifying)                                                                               | Audiotapes transcribed verbatim. Transcripts analysed by researcher, alongside anecdotal observations in researcher's journal. All transcripts read at least twice by researcher. Selective highlighting approach used.                                                                                                                   | Finding a home<br>The hardest things<br>Family care<br>Colleagues<br>Socialization<br>Teamwork<br>Questions<br>Patient emergencies and death<br>Watchfulness<br>Moving on                                                                                                                                | Participants contacted directly by researcher<br><br>No mention of a second person in data analysis process |
| Della Ratta <sup>29</sup> | 'Challenging graduate nurses' transition: care of the deteriorating patient'                           | To understand novice nurses' experiences of caring for a deteriorating patient during the first year of practice. | Phenomenology<br><br>Semi-structured interviews                              | United States<br><br>4 hospitals, ranging from small community hospitals to large tertiary referral centres.<br><br>Purposive sample (n=8) (3 from ICU, clearly identifiable) (<1 year post qualifying) | Audio recorded and transcribed verbatim by researcher. Transcripts read by the researcher in their entirety. Themes extracted and transcripts repeatedly re-read. Transcripts also read by expert qualitative researcher to confirm interpretations. Final themes reviewed by 2 expert preceptors. Reflective journal kept by researcher. | Dwelling with uncertainty - facing the unexpected; putting feelings on hold; reaching for a lifeline; anguishing in reflection.<br><br>Building me up- relying on others; seeking camaraderie; building my own toolbox.<br><br>A new lifeline, salient being- giving up the ideal; seeing possibilities. | Final themes were reviewed by expert preceptors rather than the participants themselves                     |

Supplementary material

| Author                       | Title                                                                                                                           | Main Aim(s)                                                                                                                                                                                                                                                                         | Design and Methodology                                                                                                                                | Setting and Sampling                                                                                                                                      | Data analysis                                                                                                                                                                                                                               | Main Themes                                                                                                                                                                                                                                                                                                                                                  | Main Limitations                                                                      |
|------------------------------|---------------------------------------------------------------------------------------------------------------------------------|-------------------------------------------------------------------------------------------------------------------------------------------------------------------------------------------------------------------------------------------------------------------------------------|-------------------------------------------------------------------------------------------------------------------------------------------------------|-----------------------------------------------------------------------------------------------------------------------------------------------------------|---------------------------------------------------------------------------------------------------------------------------------------------------------------------------------------------------------------------------------------------|--------------------------------------------------------------------------------------------------------------------------------------------------------------------------------------------------------------------------------------------------------------------------------------------------------------------------------------------------------------|---------------------------------------------------------------------------------------|
| Hussein et al. <sup>25</sup> | 'New graduate nurses' experiences in a clinical speciality: a follow up study of newcomer perceptions of transitional support.' | Identify areas of clinical supervision that influenced new graduates experiences during a transitional support programme (TSP).<br><br>To examine changes in new graduates perceptions of their practice environment.<br>To explore their experiences during the transition period. | Convergent mixed methods study<br><br>Survey containing closed questions, giving quantitative data and open ended questions, giving qualitative data. | Australia<br><br>Single centre study, large tertiary referral centre.<br><br>NQN purposive sample (n = 72) (< 12 months post qualifying)                  | Conventional content analysis technique used to analyse open-ended survey responses. Emergent themes initially analysed by two researchers, final data coding completed by primary researcher.                                              | Orientation and TSP as a foundation for success - Instrumental support during transition; understanding the clinical capabilities of becoming a new graduate; becoming part of the team.<br><br>Developing clinical competence - appropriate workload and working within scope of practice; adequate skill mix; building clinical confidence and competence. | Purposive sample- all students on TSP (captive population)<br><br>Single centre study |
| Lewis-Pierre <sup>30</sup>   | 'Workplace readiness of new ICU nurses: perceptions of managers, educators, preceptors and new RN graduates.'                   | To generate a theory of workplace readiness and the needs of new graduates entering the ICU from the perspective of managers, educators, preceptors and new RN graduates.                                                                                                           | Grounded theory<br><br>Semi-structured interviews, with each participant group. Separate question set for new graduates.<br><br>Pilot study           | United States<br><br>Single centre with 5 intensive care units of different specialities.<br><br>NQN purposive sample (n = 7) (< 2 years post qualifying) | Audio transcriptions and interviewer notes were analysed using a constant comparative process, consisting of open, axial and selective coding.<br>NVivo 9 software used to assist data analysis.<br>Auditor verified data analysis process. | Overwhelming experience of performance ambiguity or anxiety. Adapting to ICU. Embodying the new ICU RN role.                                                                                                                                                                                                                                                 | Single-centre study                                                                   |

Supplementary material

| Author                       | Title                                                                                                                                             | Main Aim(s)                                                                                                                          | Design and Methodology                                                                                                                                                                                          | Setting and Sampling                                                                                                  | Data analysis                                                                                                                                                                                                                                                                 | Main Themes                                                                                                                                                                                                                                | Main Limitations                                                                                                                                                            |
|------------------------------|---------------------------------------------------------------------------------------------------------------------------------------------------|--------------------------------------------------------------------------------------------------------------------------------------|-----------------------------------------------------------------------------------------------------------------------------------------------------------------------------------------------------------------|-----------------------------------------------------------------------------------------------------------------------|-------------------------------------------------------------------------------------------------------------------------------------------------------------------------------------------------------------------------------------------------------------------------------|--------------------------------------------------------------------------------------------------------------------------------------------------------------------------------------------------------------------------------------------|-----------------------------------------------------------------------------------------------------------------------------------------------------------------------------|
| O'Kane <sup>24</sup>         | 'Newly qualified nurses experiences in the intensive care unit'                                                                                   | To investigate different experiences of NQNs starting their career in critical care.                                                 | Comparative, qualitative approach<br><br>Two participant groups: NQNs and senior nurses (band 7 or above). NQNs interviewed through semi-structured interviews. Senior nurses interviewed through focus groups. | England<br><br>Single centre, large teaching hospital<br><br>NQN purposive sample (n=8) (< 1 year post qualification) | Audio tapes transcribed verbatim by researcher. Early stage data analysis used a four step process of comprehending, synthesising, theorising and re-contextualising. Later data analysis used Colaizzi's 7 Stage Framework. Participants contacted again to validate themes. | Expectations- transitional period; going into the numbers; ICU incentive.<br><br>Challenges- tasks; good day/bad day. Preconceptions: being a student in ICU; ward bias. Support- preceptorship, competency based practice; supernumerary. | Methodology not fully described<br><br>Research philosophy not stated<br><br>Coding solely by the researcher<br><br>Researcher an educator on the unit<br><br>Single centre |
| Saghafi et al. <sup>26</sup> | 'New graduates nurses' experiences of interactions in the critical care unit.'                                                                    | To highlight the importance of interaction in the intensive care setting from the new graduate nurse perspective.                    | Phenomenology<br><br>Individual semi-structured interviews                                                                                                                                                      | Australia<br><br>Single centre, major acute hospital<br><br>NQN purposive sample (n=10) (<12 months post qualifying)  | Audiotapes transcribed into Microsoft word. Transcripts reread until themes emerged. CAQDAS was used to accelerate and automate the coding process. Participants were invited to validate findings.                                                                           | Interaction with others- interaction with patients; interactions with other members of the ICU team; who is approachable; feedback.                                                                                                        | Researcher was known to the participants<br><br>Single centre                                                                                                               |
| Salkaya <sup>27</sup>        | 'The lived experiences of graduate nurses working in an intensive care unit as their first placement after graduation: a phenomenological study.' | To gain insight into the experiences of graduate nurses working in an intensive care unit as their first placement after graduation. | Phenomenology<br><br>Individual semi-structured interviews                                                                                                                                                      | Australia<br><br>Single centre, private hospital<br><br>Purposive sample (n= 5) (< 1 year post qualifying)            | Audiotapes transcribed verbatim by researcher. Transcripts reviewed by participants. Analysed using a 3 stage process: naïve reading, structural analysis and comprehensive understanding/interpreted whole. Process cross-checked by dissertation supervisor.                | Challenges<br>Hyper-feelings<br>Needing education<br>Support<br>Time<br>Confidence<br>Wanting to stay in ICU                                                                                                                               | Researcher was also an educator at the hospital participants were recruited from<br><br>Unable to recruit from other sites (private hospitals only)                         |

# Supplementary material

| Author              | Title                                                                                                                                                                                    | Main Aim(s)                                                                                                                                                                                                                                                                                                    | Design and Methodology                                                                                                                                                                                                                                                                       | Setting and Sampling                                                                                                                                                 | Data analysis                                                                                                                                                                                                                                                                                     | Main Themes                                                                                                                                                                                                                                                                          | Main Limitations                                                                                                                                                                                        |
|---------------------|------------------------------------------------------------------------------------------------------------------------------------------------------------------------------------------|----------------------------------------------------------------------------------------------------------------------------------------------------------------------------------------------------------------------------------------------------------------------------------------------------------------|----------------------------------------------------------------------------------------------------------------------------------------------------------------------------------------------------------------------------------------------------------------------------------------------|----------------------------------------------------------------------------------------------------------------------------------------------------------------------|---------------------------------------------------------------------------------------------------------------------------------------------------------------------------------------------------------------------------------------------------------------------------------------------------|--------------------------------------------------------------------------------------------------------------------------------------------------------------------------------------------------------------------------------------------------------------------------------------|---------------------------------------------------------------------------------------------------------------------------------------------------------------------------------------------------------|
| Wiles <sup>31</sup> | 'Basic knowledge in critical care: a comparison of experienced and newly graduated nurses augmented with an examination of newly graduated nurses experience making clinical judgements' | <p>To investigate the level of basic knowledge of NGNs working in the critical care setting and to compare it to the level of basic knowledge of their experienced counterparts.</p> <p>To understand and interpret the experiences of NGNs as they make clinical judgements in the critical care setting.</p> | <p>Mixed methods design. Qualitative portion used phenomenology.</p> <p>Quantitative portion used a Basic Knowledge Assessment Tool (BKAT-7). Qualitative element used individual semi-structured interviews. Findings from both quantitative and qualitative studies were triangulated.</p> | <p>United States</p> <p>7 hospitals in one region (3 represented in qualitative sample)</p> <p>Purposive sample (n = 5) (&lt;18 months post qualifying)</p> <p>.</p> | <p>Audiotapes transcribed verbatim into a word processing programme by a paid transcriptionist. Data analysed by a principle investigator, 2 members of the dissertation committee and an external qualitative researcher. Secondary interviews by telephone or in person to validate themes.</p> | <p>Developing confidence in practice- situational paralysis; self-confidence; defining moment.</p> <p>Seeking assistance- importance of support; lack of support; calling the physician.</p> <p>Decision making- self-doubt; lack of experience; decision framework; reflection.</p> | <p>Transcripts not reviewed by participants for accuracy</p> <p>Coding process not detailed – e.g. manual or software used, no coding tree</p> <p>Limited sample – 3 participants from one hospital</p> |
